# Supplementary material
Source: PubMed Central journal article supplement (PMC4156102)
Supplement: NIHMS622421-supplement-SI_Table_2.pdf [file NIHMS622421-supplement-SI_Table_2.pdf]

**Table S2. Verified M7CK Interacting Proteins, Related to Figure 2**

| <b>M7CK-bound protein</b>                | <b>Chromatin complex / Function</b>                                         | <b>Binds M7CK</b> | <b>Zn-dep binding</b> | <b>Binding verified</b> |
|------------------------------------------|-----------------------------------------------------------------------------|-------------------|-----------------------|-------------------------|
| Ring1a (Ring finger protein)             | PRC1 / E3 ubiquitin ligase                                                  | M                 | ?                     | E, T                    |
| RYBP (Ring binding protein)              | PRC1, 2                                                                     | L, M              | +                     | E, T, P                 |
| RNF2 (Ring finger 2)                     | PRC1 / E3 ubiquitin ligase                                                  | L, M              | +                     | E, T                    |
| Ezh2 (Enhancer of Zeste Homolog)         | PRC2 / Histone Methyltransferase                                            | L, M, S           | -                     | E, T, P                 |
| EED1 (Embryonic Ectoderm Dev)            | PRC2                                                                        | L, M              |                       | E, T                    |
| YY1 (YY1 TF)                             | TF, PRC1, 2 and INO80/ putative DNA-binding                                 | L, M, S           | +                     | E, T                    |
| INO80                                    | INO80 chromatin remodeling complex / DNA helicase                           | L                 | -                     | E, T                    |
| DDX3X (DEAD box helicase)                | INO80 / ATP-dep RNA helicase                                                | L, M              | ?                     | E, T                    |
| RuvBL1 / Pontin                          | TIP60 histone acetylase chromatin remodeling complex / ATP-dep DNA helicase | ?                 | ?                     | E                       |
| RuvBL2 / Reptin                          | INO80 / ATP-dep DNA helicase                                                | L, M              | ?                     | E, T                    |
| DDB1 damage-specific DNA binding protein | Component of Cul4 DNA damage-repair complex                                 | ?                 | ?                     | E                       |
| Cul4 (Cullin 4)                          | component of DNA damage repair complex / E3 ubiquitin ligase                | L,?, ?            | ?                     | E, T                    |
| DBC1 (DBIRD component)                   | Inhibitor of HDAC3 and Sirt1                                                | L                 | ?                     | E, T                    |
| Beta Catenin                             | TF, binds multiple chromatin remodeling complexes                           | ?                 | ?                     | E                       |
| Sirt1 (Sirtuin)                          | CLOCK:BMAL1 chromatin complex /protein/histone deacetylase                  | L, M, S           | ?                     | E, T                    |

L, M, S = long, medium, and short M7CK proteins. E refers to co-immunoprecipitation of endogenous proteins; T refers to co-immunoprecipitation of co-transfected, epitope-tagged M7CK and binding protein; P refers to pull-down of purified M7CK-L and purified binding protein. TF: Transcription Factor, PRC1: Polycomb Repressor Complex 1, PRC2: Polycomb Repressor Complex 2.
