# Supplementary material
Source: PubMed Central journal article supplement (PMC4156102)

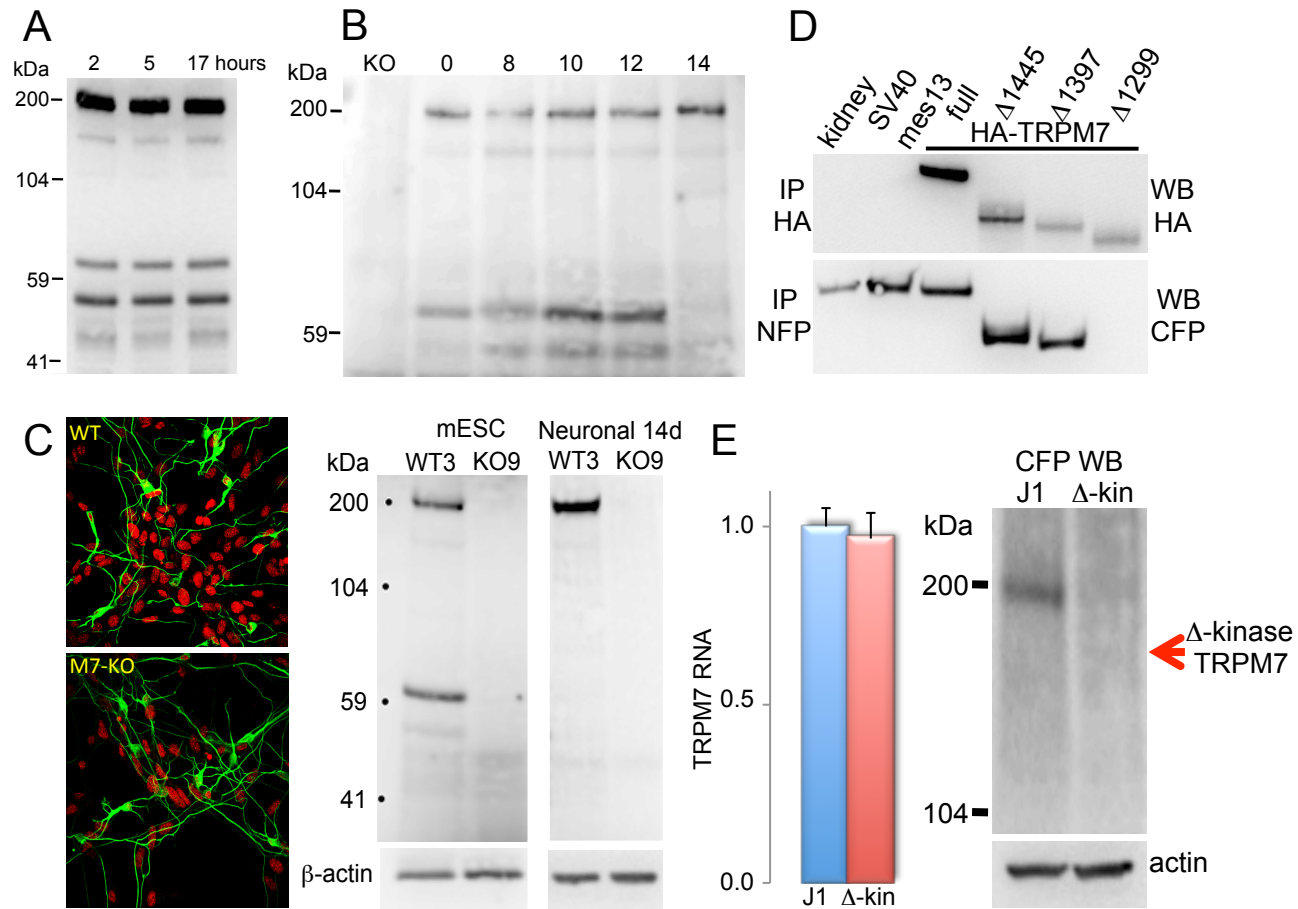

Fig. S1

Supplement: NIHMS622421-supplement-SI_Combined_Figs.pdf [file NIHMS622421-supplement-SI_Combined_Figs.pdf]
